# Supplementary material for: Syntheses, structures, and optical properties of novel zinc(ii) complexes with multicarboxylate and N-donor ligands
Source: Royal Society of Chemistry journal article supplement (doi:10.1039/b707159k), 2007-01-01
Supplement: b707159k.pdf [file b707159k.pdf]

**Supporting information:**

# Syntheses, Structures, and Optical Properties of Novel Zinc(II) Complexes with Multicarboxylate and N-donor Ligands

Qian Chu, Guang-Xiang Liu, Yong-Qing Huang, Xiao-Feng Wang, Wei-Yin Sun\*

*Coordination Chemistry Institute, State Key Laboratory of Coordination Chemistry, School of Chemistry and Chemical Engineering, Nanjing University, Nanjing 210093, China*

**Table S1** Distance [ $\text{\AA}$ ] and Angles [deg] of Hydrogen Bonding for Complexes **1** – **5**

| D-H $\cdots$ A                                                                      | Distance of D $\cdots$ A ( $\text{\AA}$ ) | Angle of D-H-A (deg.) |
|-------------------------------------------------------------------------------------|-------------------------------------------|-----------------------|
| [Zn <sub>2</sub> (OA)(bipy)(H <sub>2</sub> O)] $\cdot$ 0.5(bipy) ( <b>1</b> )       |                                           |                       |
| O1W-H1WA-N3#1                                                                       | 2.807(5)                                  | 154                   |
| O1W-H1WB-O7#2                                                                       | 2.731(3)                                  | 157                   |
| C24-H24-O3#3                                                                        | 3.320(4)                                  | 142                   |
| C27-H27-O7#4                                                                        | 3.274(6)                                  | 145                   |
| [Zn <sub>2</sub> (OA)(dib)(H <sub>2</sub> O)] $\cdot$ H <sub>2</sub> O ( <b>2</b> ) |                                           |                       |
| O2W-H2WA-O1#5                                                                       | 2.730(7)                                  | 145                   |
| O2W-H2WB-O1W#6                                                                      | 2.513(9)                                  | 170                   |
| C19-H19-O1#7                                                                        | 3.255(6)                                  | 156                   |
| C22-H22-O4#5                                                                        | 3.417(6)                                  | 166                   |
| C26-H26-O8#8                                                                        | 3.381(5)                                  | 152                   |
| C28-H28-O7#9                                                                        | 3.374(5)                                  | 169                   |
| [Zn <sub>2</sub> (OA)(bbi) <sub>2</sub> ] $\cdot$ 3H <sub>2</sub> O ( <b>3</b> )    |                                           |                       |
| C6-H6A-O8#10                                                                        | 3.409(6)                                  | 171                   |
| C17-H17A-O9#11                                                                      | 3.101(6)                                  | 131                   |
| C17-H17A-O1W#12                                                                     | 3.284(6)                                  | 142                   |
| C20-H20A-O3W#12                                                                     | 3.213(9)                                  | 127                   |

|                                                                                                    |           |     |
|----------------------------------------------------------------------------------------------------|-----------|-----|
| C24-H24A-O7#11                                                                                     | 3.219(6)  | 138 |
| C27-H27A-O2                                                                                        | 3.131(6)  | 168 |
| C29-H29A-O1W#13                                                                                    | 3.309(6)  | 160 |
| C34-H34A-O4#13                                                                                     | 3.193(6)  | 154 |
| C36-H36A-O2W#14                                                                                    | 3.291(9)  | 140 |
| <b>[Zn<sub>2</sub>(OA)(phen)<sub>2</sub>(H<sub>2</sub>O)] (4)</b>                                  |           |     |
| C1-H1-O1#15                                                                                        | 3.312(5)  | 135 |
| O1W-H1WA-O8#16                                                                                     | 3.319(6)  | 163 |
| O1W-H1WB-O2                                                                                        | 2.762(5)  | 170 |
| C10-H10-O1W                                                                                        | 3.060(6)  | 121 |
| C15-H15-O4#17                                                                                      | 3.080(5)  | 120 |
| C18-H18-O8#18                                                                                      | 3.322(6)  | 164 |
| <b>[Zn<sub>4</sub>(OA)<sub>2</sub>(2,2'-bipy)<sub>2</sub>(H<sub>2</sub>O)]·2H<sub>2</sub>O (5)</b> |           |     |
| O1W-H1WA-O16#19                                                                                    | 2.606(6)  | 127 |
| O2W-H2WA-O9#20                                                                                     | 2.908(8)  | 177 |
| O2W-H2WB-O2#21                                                                                     | 3.014(8)  | 140 |
| O3W-H3WA-O12#22                                                                                    | 2.859(10) | 177 |
| O3W-H3WB-O17#23                                                                                    | 3.092(10) | 127 |
| C6-H6-O14#24                                                                                       | 3.404(7)  | 169 |
| C30-H30-O5#25                                                                                      | 3.393(8)  | 171 |
| C36-H36-O3W#26                                                                                     | 3.269(13) | 174 |
| C39-H39-O3W#26                                                                                     | 3.483(12) | 174 |
| C43-H43-O10                                                                                        | 3.270(9)  | 133 |
| C46-H46-O2W#27                                                                                     | 3.416(10) | 175 |
| C49-H49-O2W#27                                                                                     | 3.249(10) | 174 |
| C50-H50-O8#28                                                                                      | 3.208(8)  | 133 |
| C52-H52-O1W                                                                                        | 3.066(8)  | 120 |

Symmetry transformations are used to generate equivalent atoms: #1 1+x,y,z; #2 2-x, 2-y,2-z; #3 3/2-x,-1/2+y,3/2-z; #4 1-x, 2-y,2-z; #5 1-x,-1/2+y,1/2-z; #6 x,y,-1+z; #7 1+x,y,z; #8 2-x,-1/2+y,1/2-z; #9 2-x,2-y,1-z; #10 3-x,1-y,-2-z; #11 x,y,1+z; #12 2-x,1-y,-1-z; #13 1/2+x,1/2-y,1/2+z; #14 -1/2+x,1/2-y,1/2+z; #15 1/2-x,-1/2+y,1/2-z; #16 -1/2+x,3/2-y,-1/2+z; #17 -1/2-x,1/2+y,1/2-z; #18 1/2-x,1/2+y,-1/2+z; #19 1/2+x,1/2-y,-1/2+z; #20 1+x,1+y,z; #21 1/2+x,1/2+y,z; #22 x,y,-1+z; #23 1/2+x,1/2+y,-1+z; #24 -1/2+x,1/2-y,-1/2+z; #25 1/2+x,1/2-y,1/2+z; #26 -1+x,y,z; #27 1/2+x,3/2-y,1/2+z; #28 3/2+x,1/2-y,1/2+z.

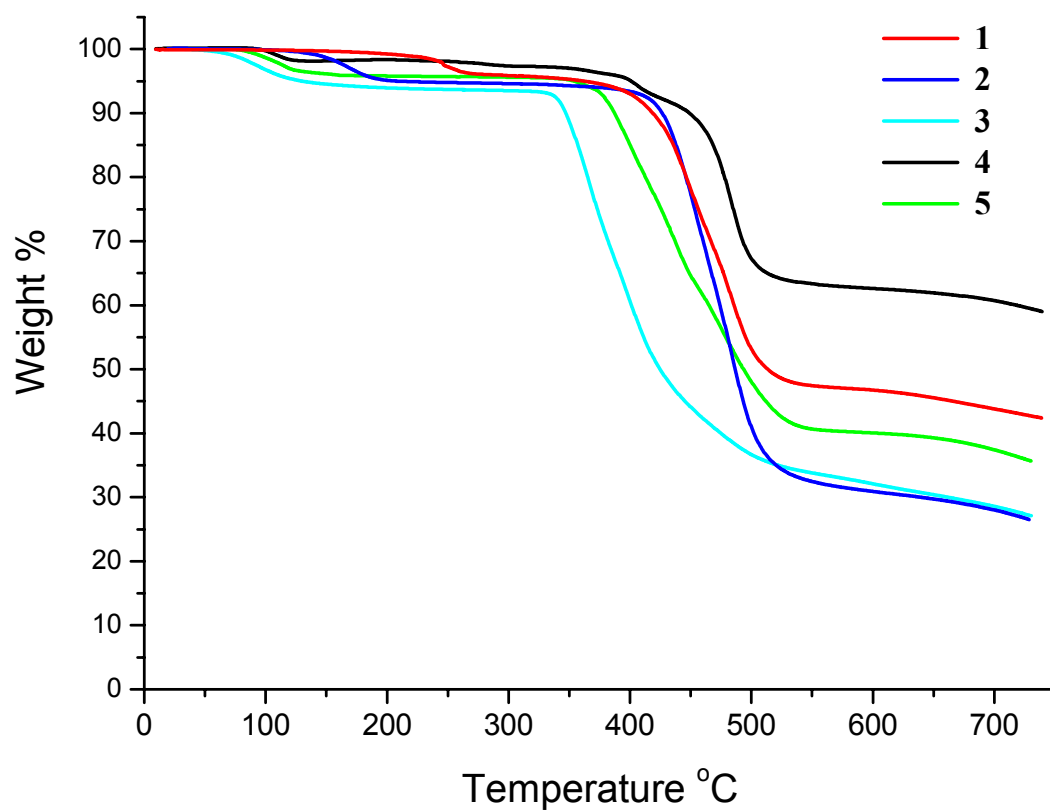

**Figure S1** Thermal gravimetric curves of complexes **1 - 5**

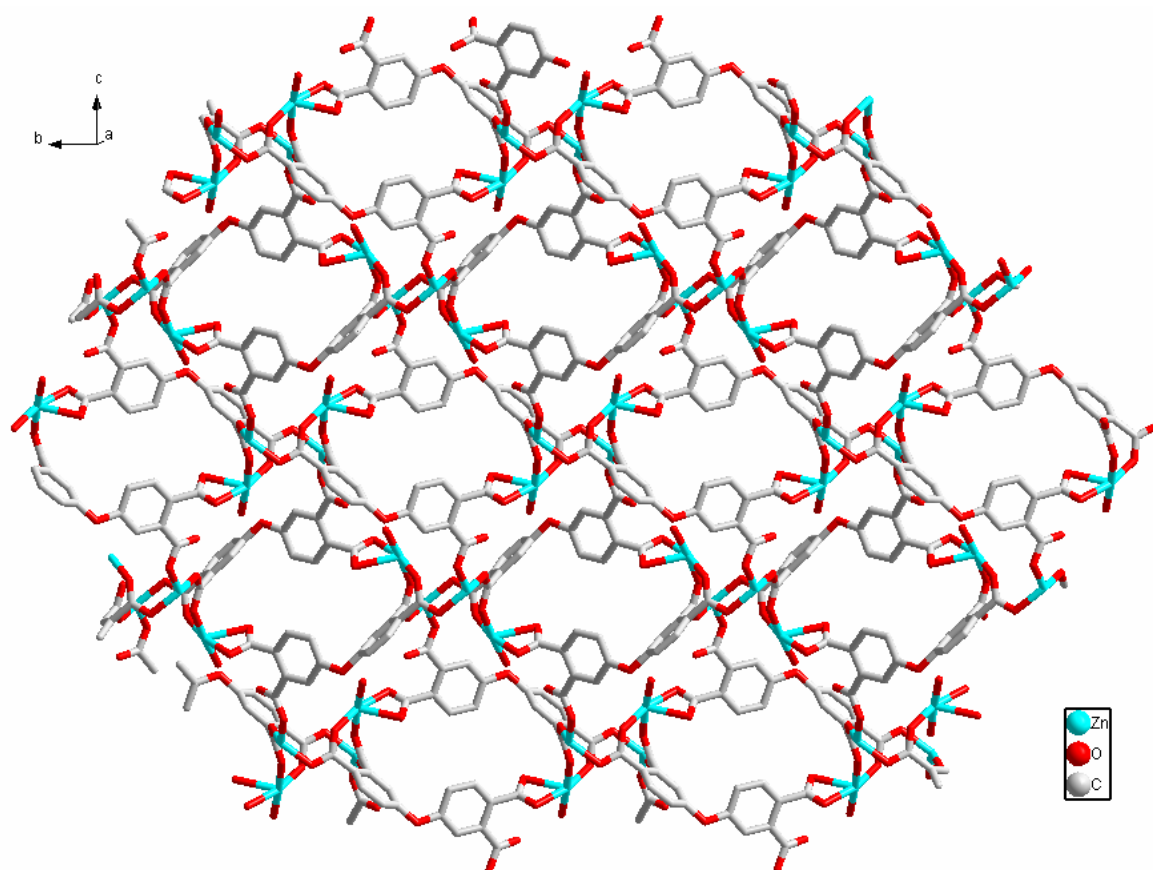

**Figure S2** Infinite 2D network structure of **1**.

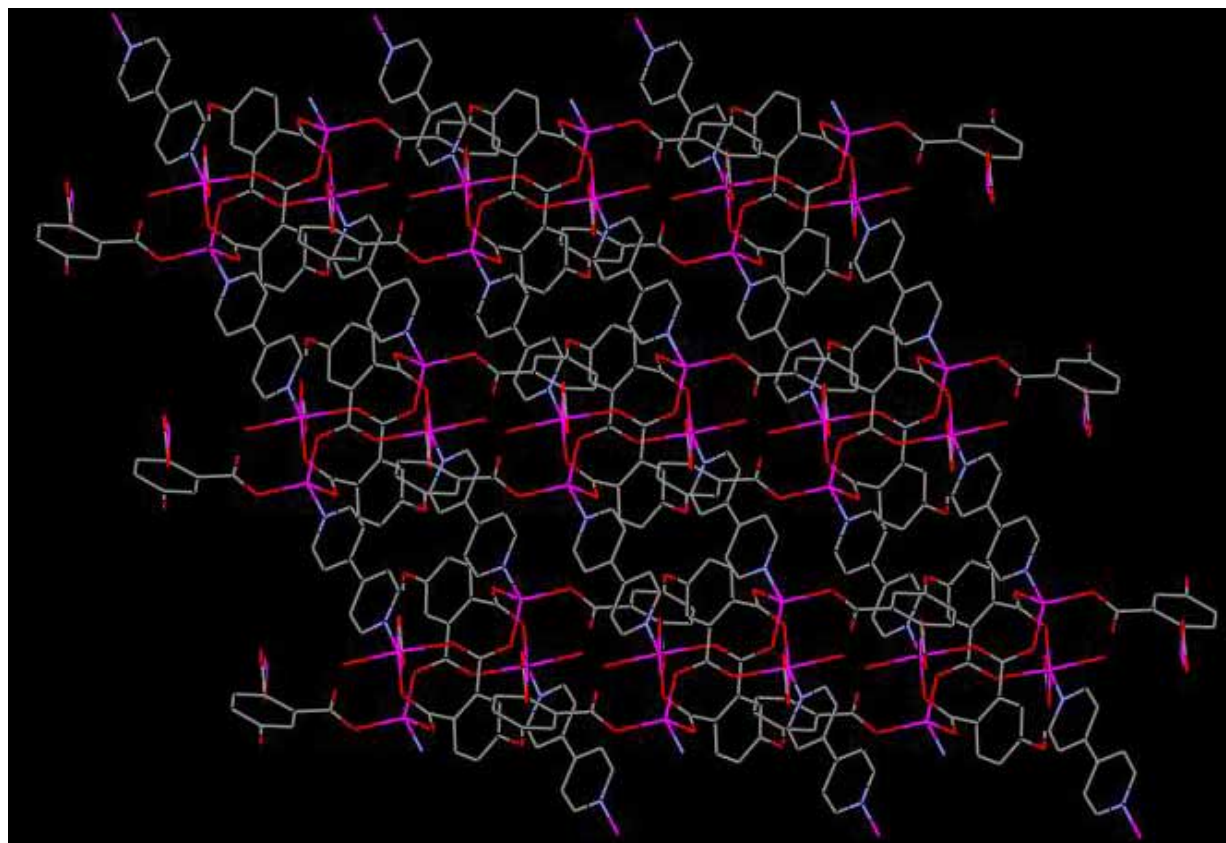

**Figure S3** 3D structure of **1** pillared by 4,4'-bipy ligands.

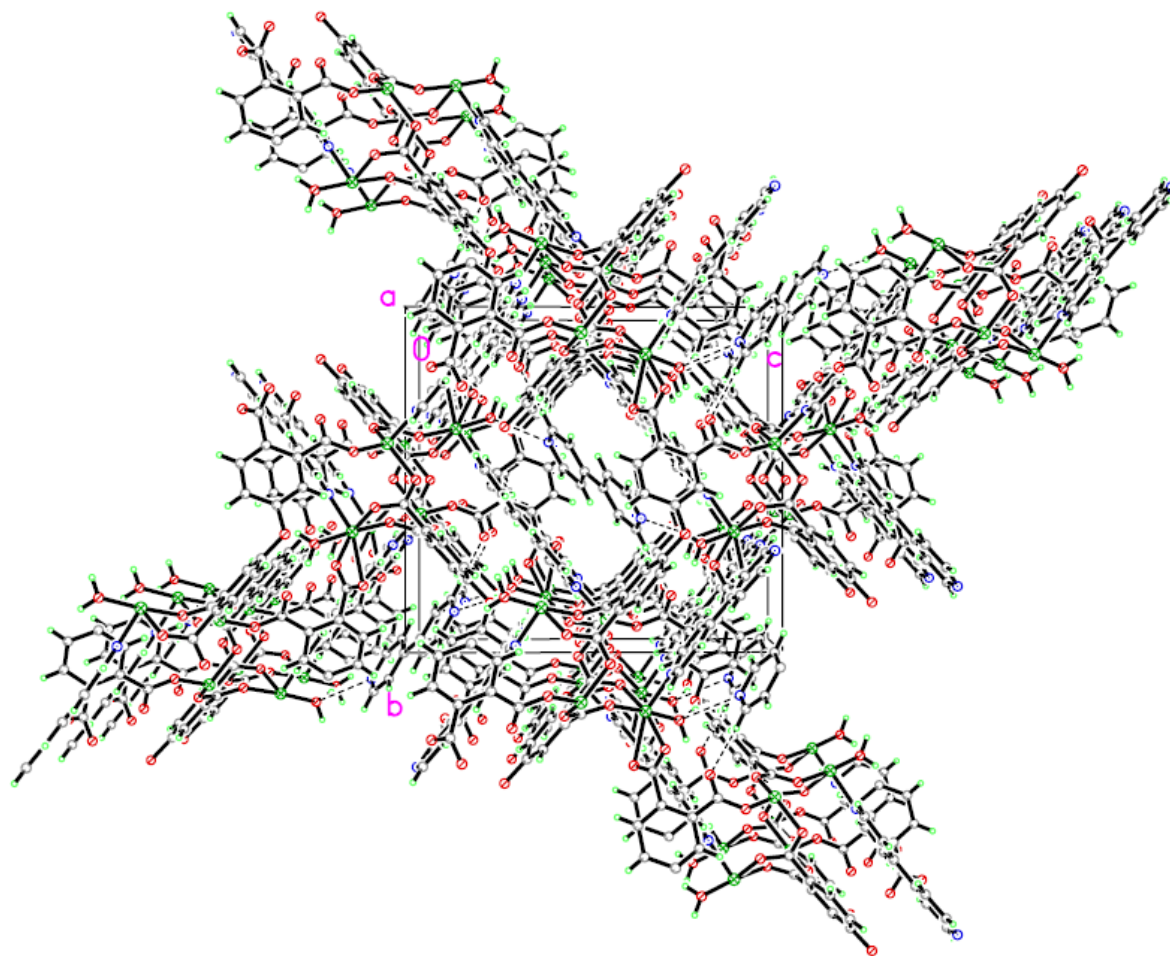

**Figure S4** Crystal packing diagram of **1** with hydrogen bonds indicated by dashed lines.

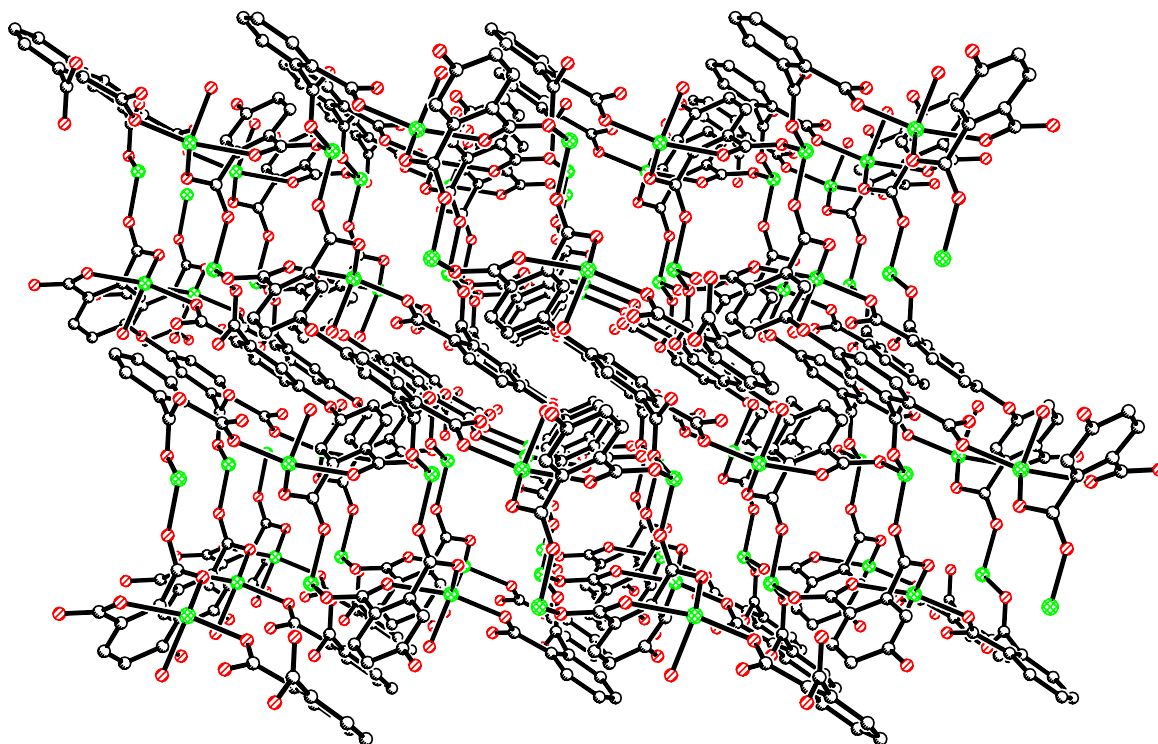

**Figure S5** 3D structure of **2** formed by connection of the  $Zn_4$  units through the  $OA^{4-}$  ligands.

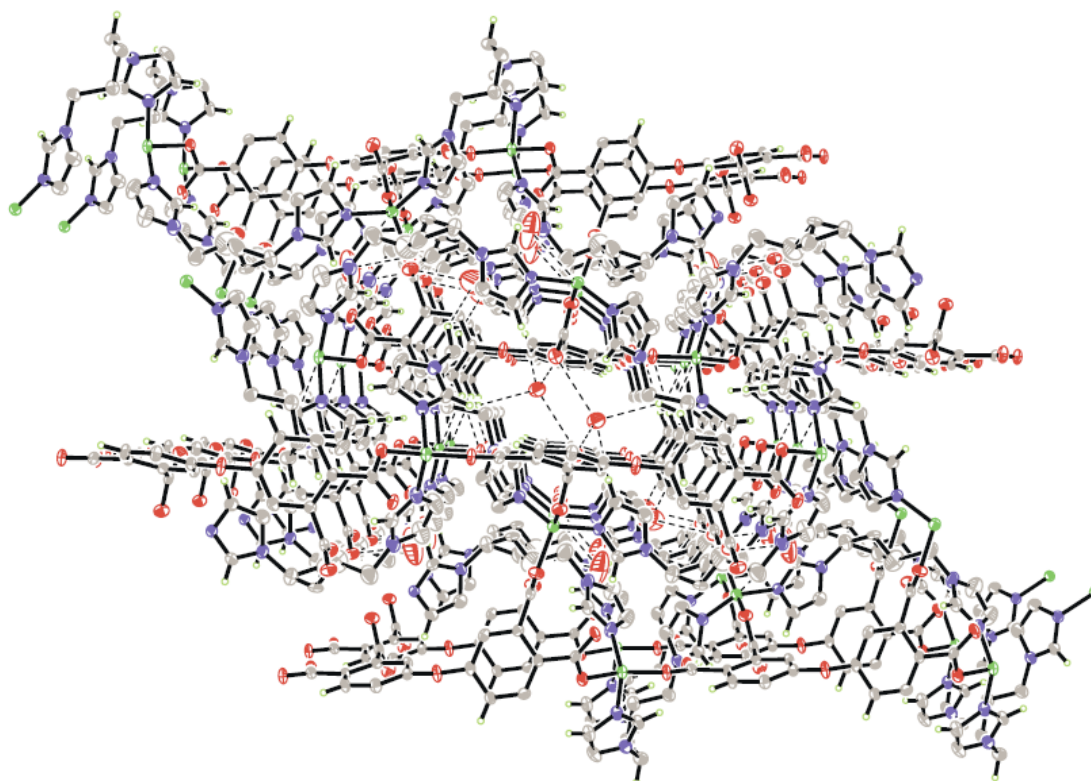

**Figure S6** Crystal packing diagram of **3** with hydrogen bonds indicated by dashed lines.
